# Supplementary material for: An Electron-Transporting Thiazole-Based Polymer Synthesized Through Direct (Hetero)Arylation Polymerization
Source: PubMed Central journal article supplement (PMC6100489; doi:10.3390/molecules23061270), 2018-05-25
Supplement: molecules-23-01270-s001.pdf [file molecules-23-01270-s001.pdf]

# Electron-transporting Thiazole-based polymer synthesized through direct (hetero)arylation polymerization

Patricia Chávez<sup>1</sup>, Ibrahim Bulut<sup>1</sup>, Sadiara Fall<sup>2</sup>, Olzhas Ibraikulov<sup>2</sup>, Christos L. Chochos<sup>3</sup>, Jérémy Bartringer<sup>2</sup>, Thomas Heiser<sup>2</sup>, Patrick Lévêque<sup>2</sup> and Nicolas Leclerc<sup>1,\*</sup>

<sup>1</sup> ICPEES UMR 7515, Université de Strasbourg-CNRS, 25 rue Becquerel, 67087 Strasbourg, France; leclercn@unistra.fr

<sup>2</sup> ICube UMR 7357, Université de Strasbourg-CNRS, 23 rue du Loess, 67037 Strasbourg, France; patrick.leveque@unistra.fr

<sup>3</sup> Advent Technologies SA, Patras Science Park, Stadiou Street, Platani-Rio, 26504, Patra, Greece; chochos@eie.gr

\*Correspondence: leclercn@unistra.fr; Tel.: +33-368-852-709

## Supplementary Information.

### 1. Polymer <sup>1</sup>H NMR traces

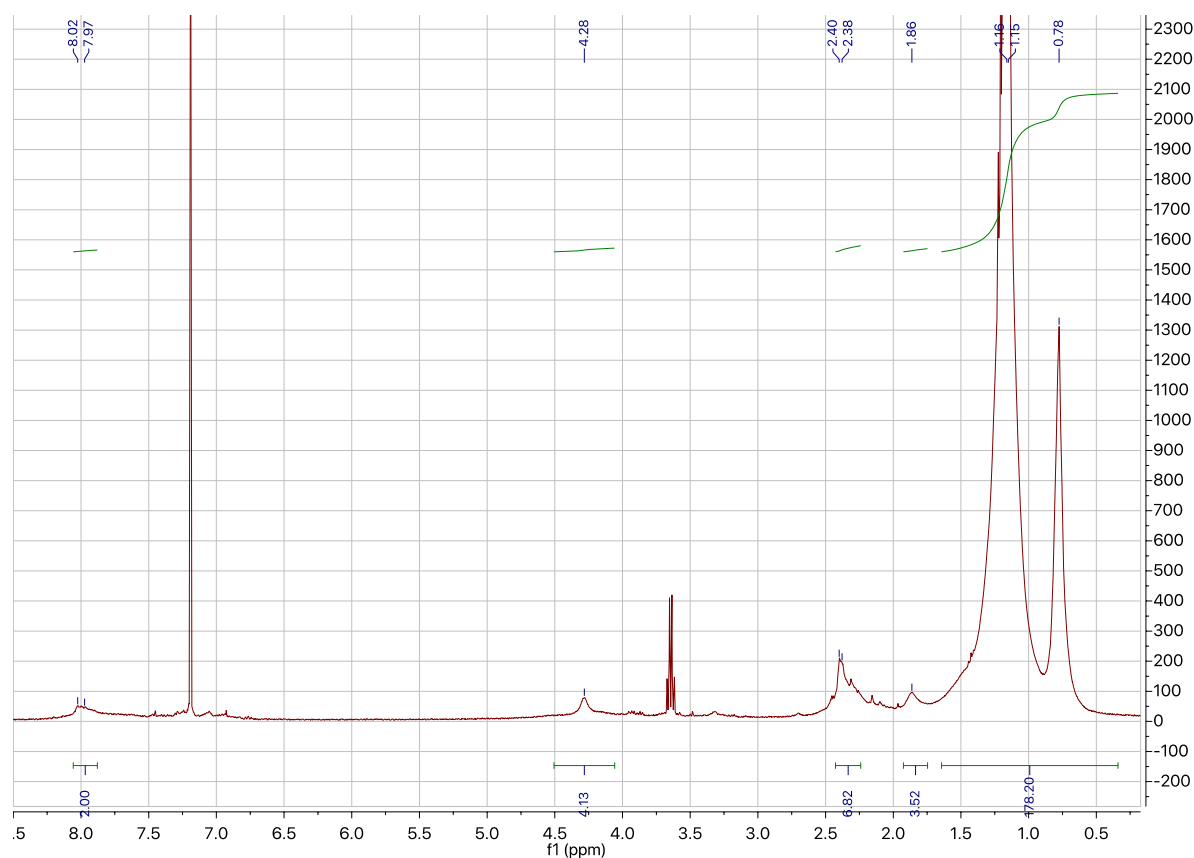

Figure S1. <sup>1</sup>H NMR spectrum of the P(TzDPP-Th) batch B1 in CDCl<sub>3</sub>

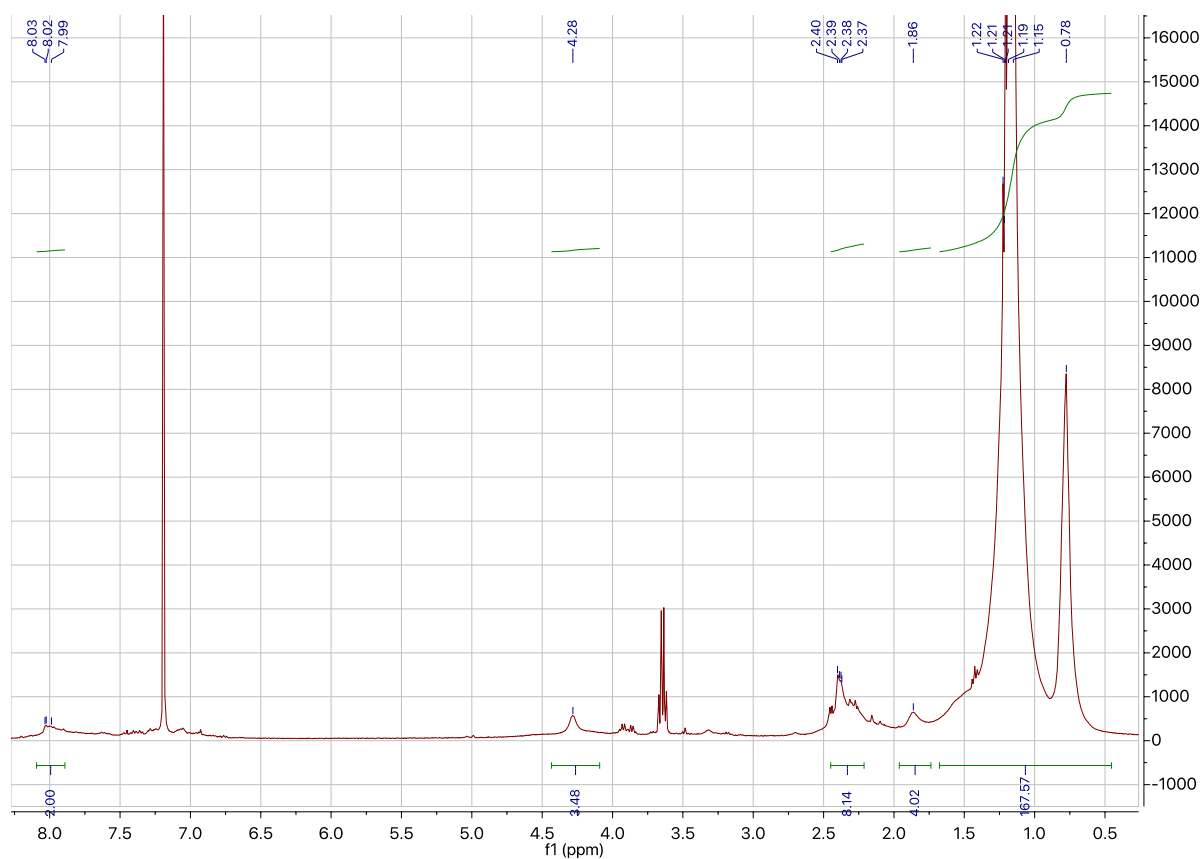

**Figure S2.**  $^1\text{H}$  NMR spectrum of the P(TzDPP-Th) batch B2 in  $\text{CDCl}_3$

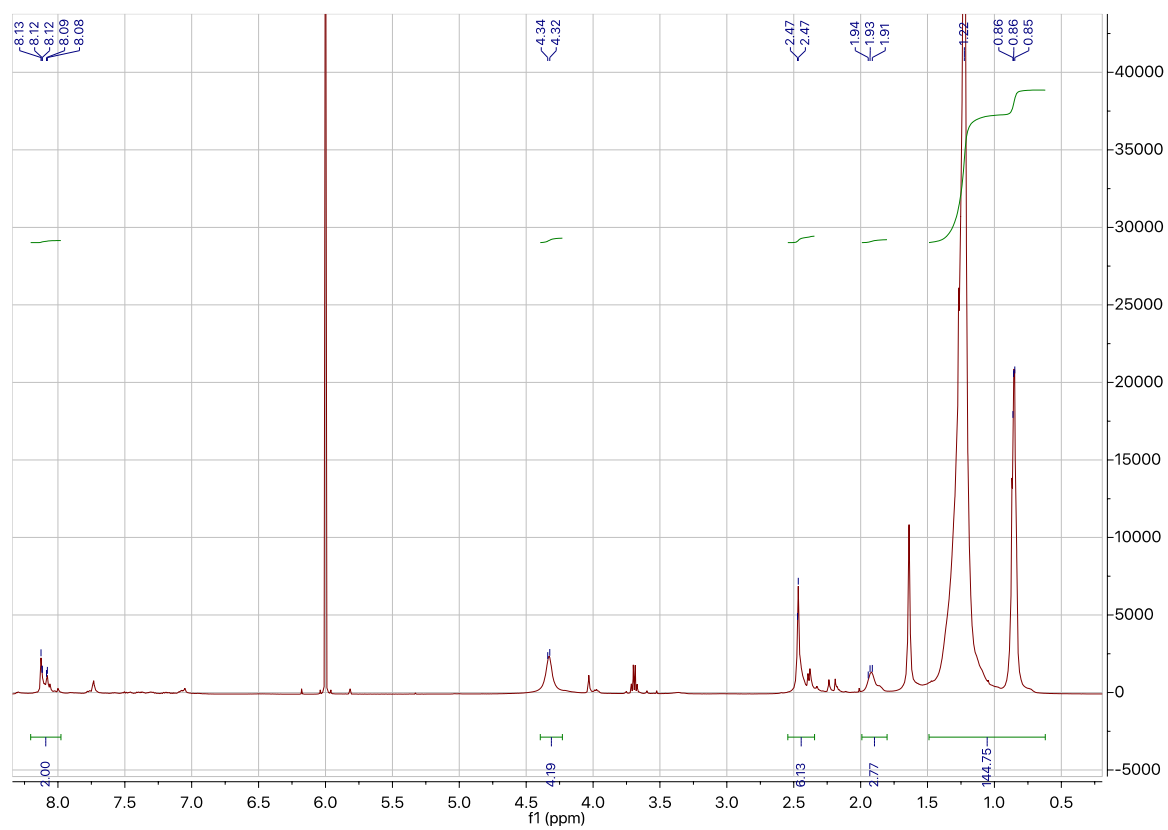

**Figure S3.**  $^1\text{H}$  NMR spectrum of the P(TzDPP-Th) batch B3 in  $\text{C}_2\text{D}_2\text{Cl}_4$

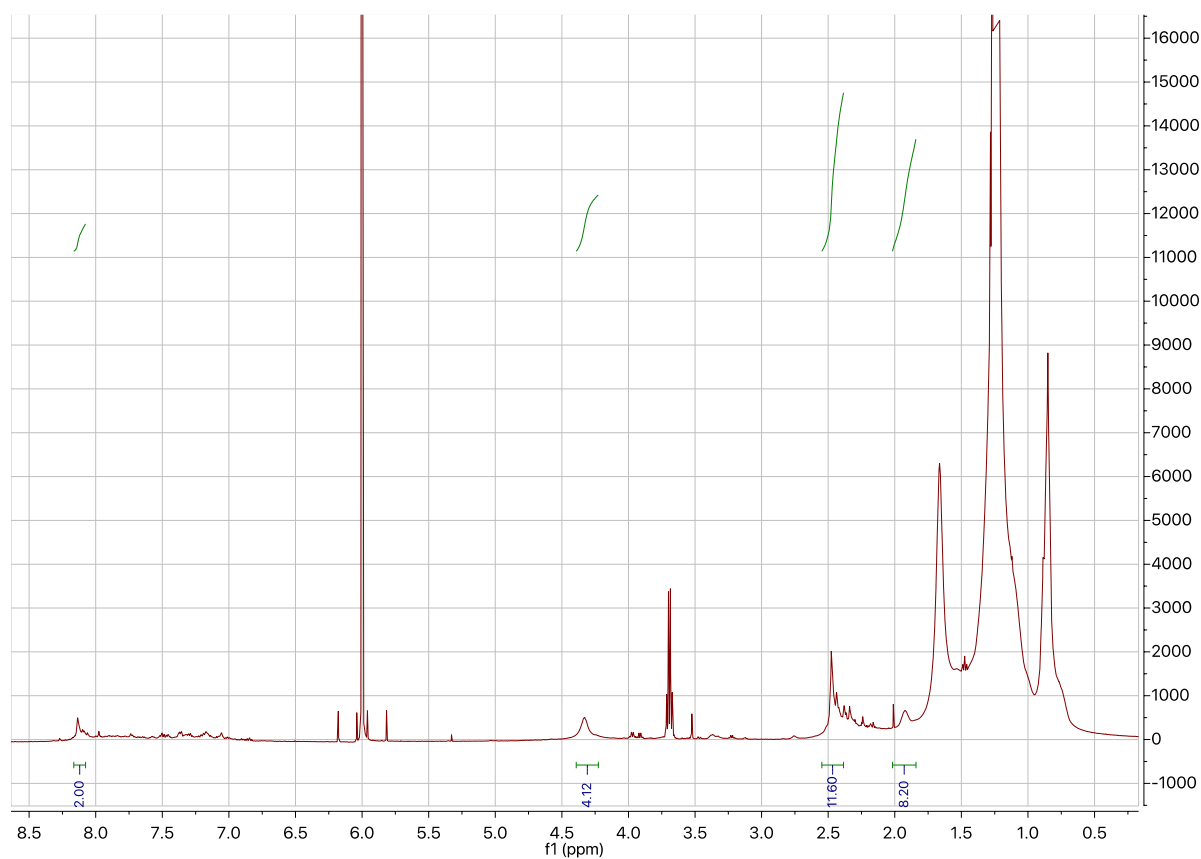

**Figure S4.** <sup>1</sup>H NMR spectrum of the P(TzDPP-Th) batch B4 in C<sub>2</sub>D<sub>2</sub>Cl<sub>4</sub>

## 2. Polymer SEC chromatograms

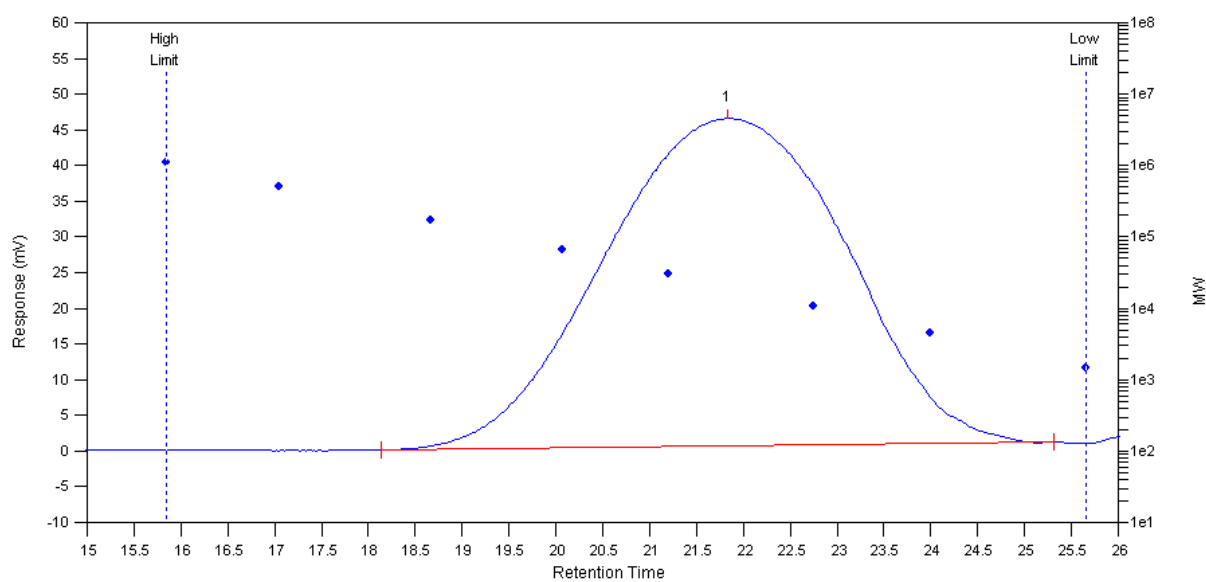

**Figure S5.** SEC chromatogram of the P(TzDPP-Th) batch B1

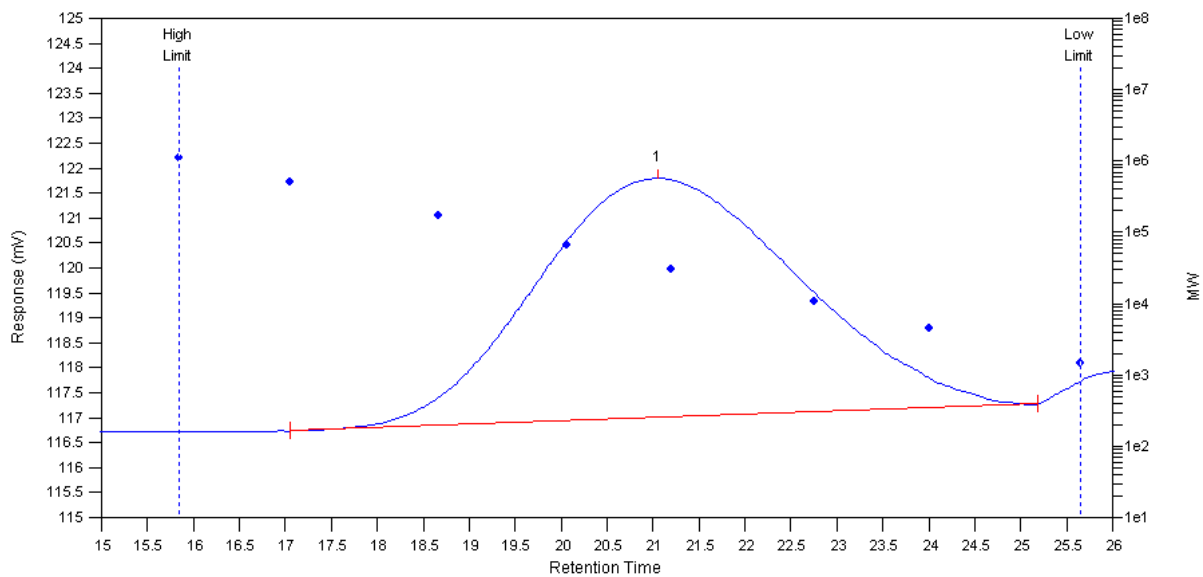

**Figure S6.** SEC chromatogram of the P(TzDPP-Th) batch B2

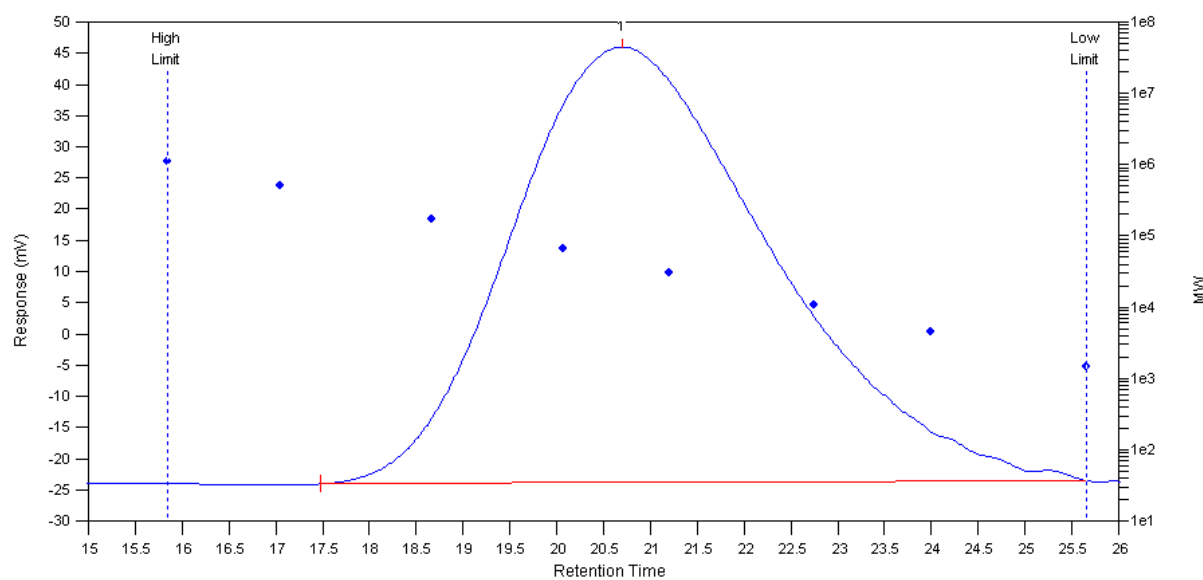

**Figure S7.** SEC chromatogram of the P(TzDPP-Th) batch B3

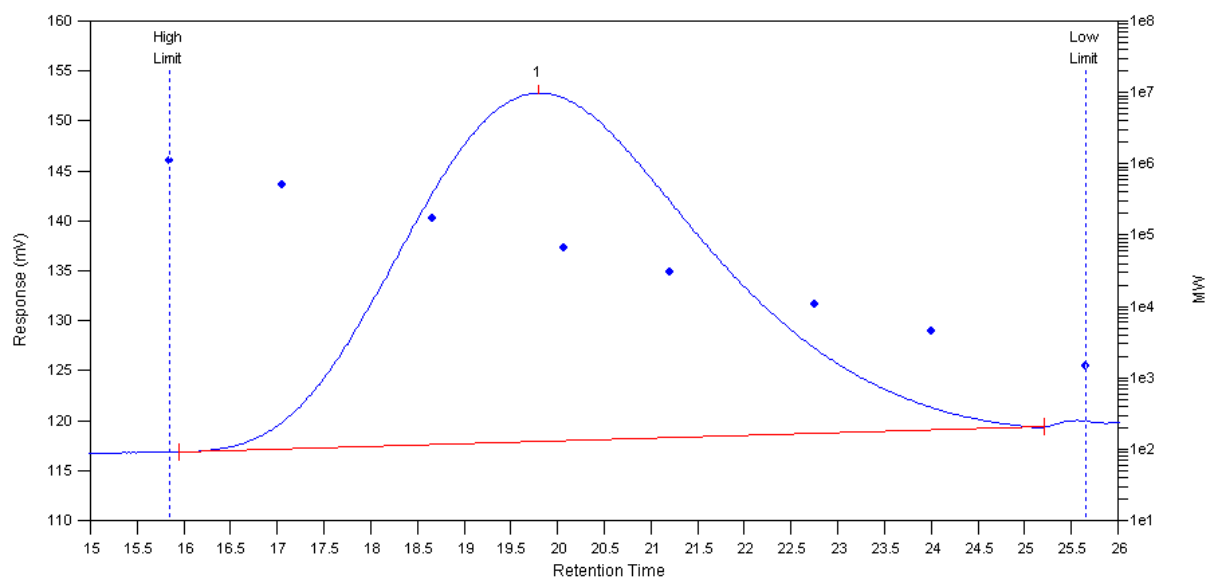

**Figure S8.** SEC chromatogram of the P(TzDPP-Th) batch B4

### 3. Cyclic voltammogram

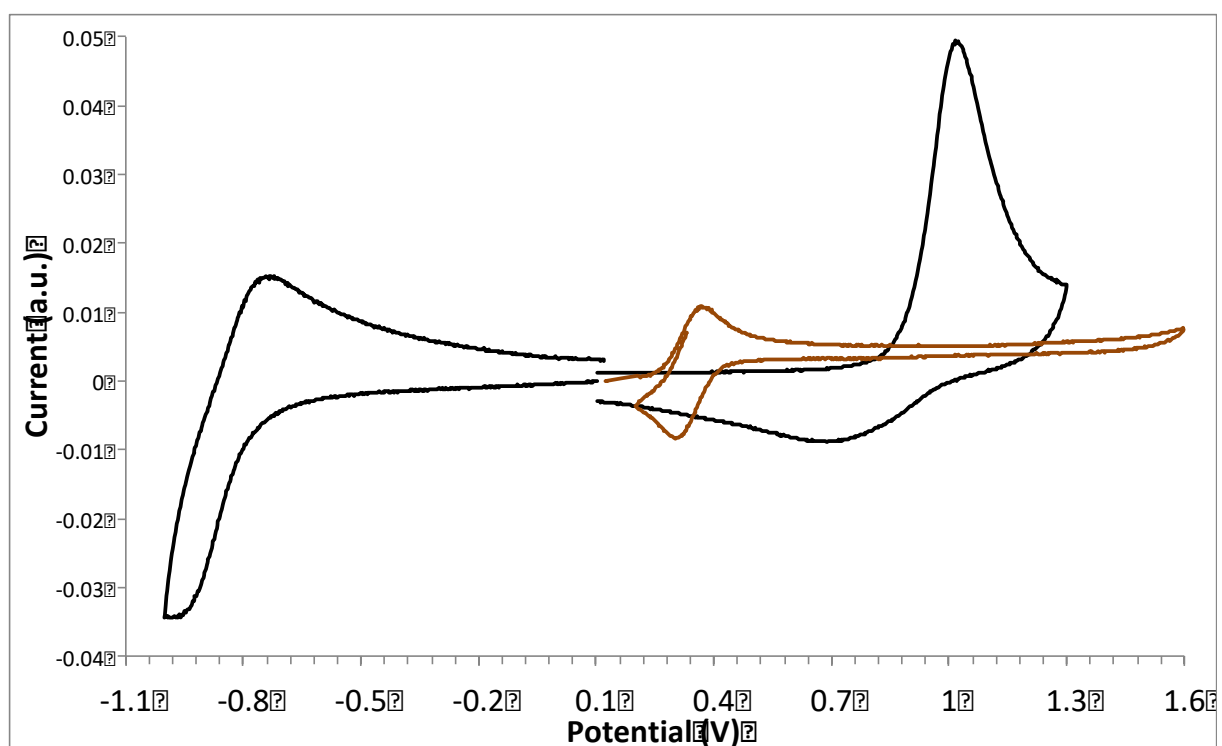

**Figure S9.** Cyclic voltammogram of P(TzDPP-Th) reference in thin-film recorded in acetonitrile + 0.2 M  $[\text{NBu}_4][\text{PF}_6]$ . Cyclic voltammogram of ferrocene vs SCE. Platinum working electrode, sweep-rate:  $100 \text{ mV}\cdot\text{s}^{-1}$ .

### 4. OFET output and transfer characteristic

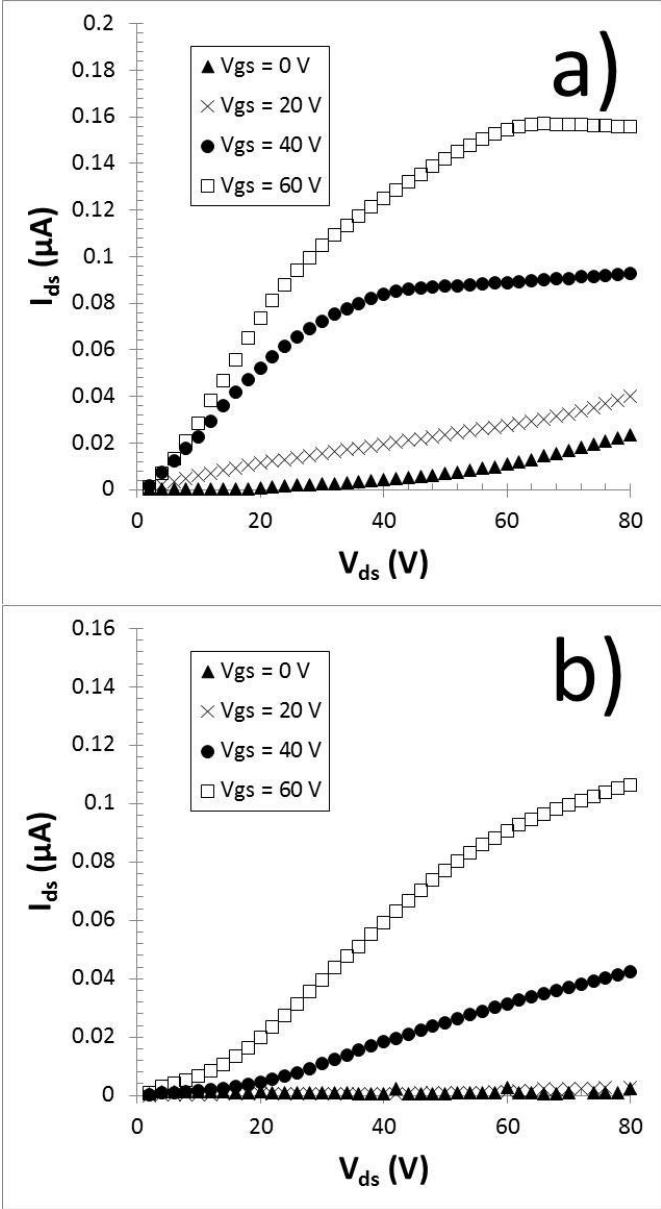

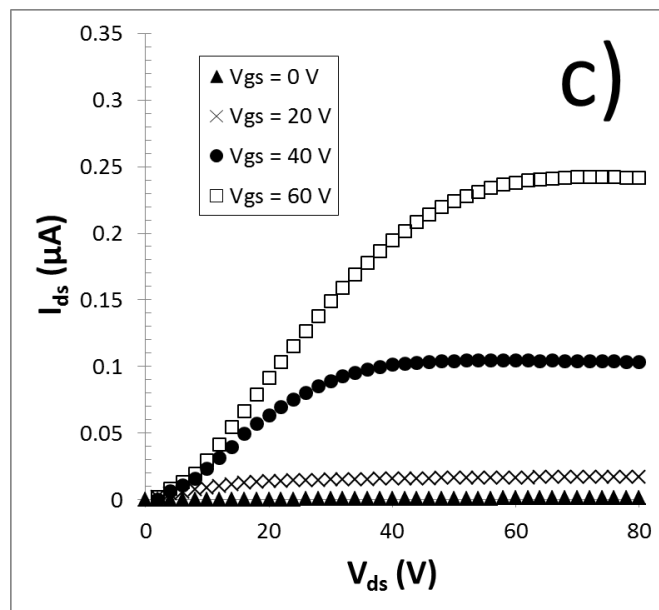

Figure S10. Output characteristics of the OFETs whose channel is **B2** (a), **B3** (b) and **B4** (c).  $I_{ds}$  is the drain-source current,  $V_{ds}$  the voltage difference between drain and source and  $V_{gs}$  the voltage difference between gate and source.

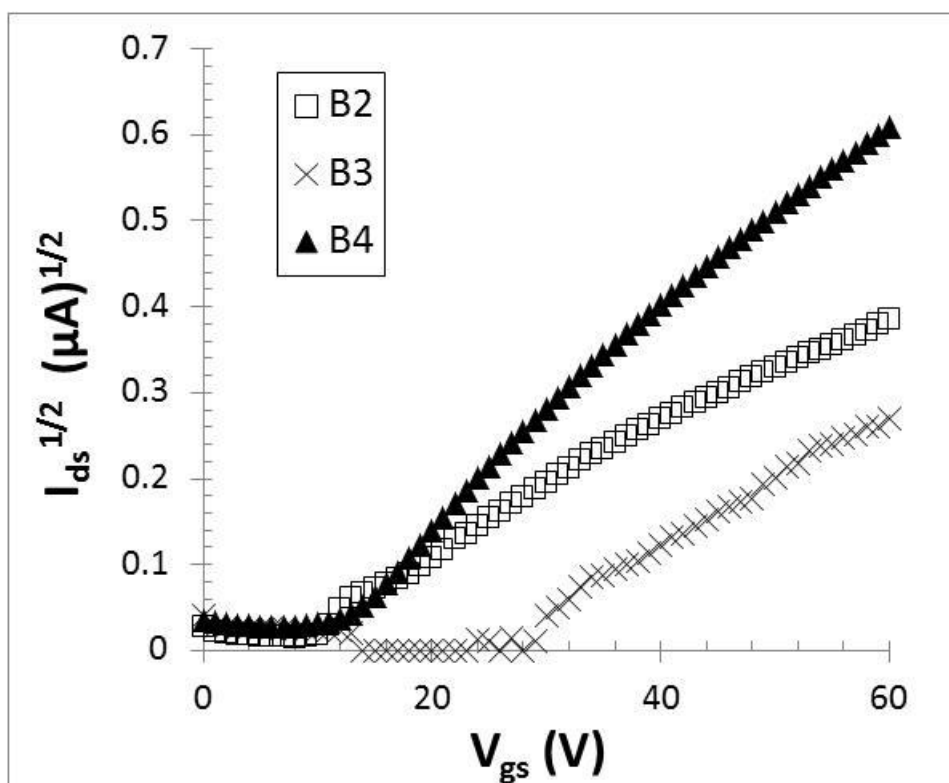

Figure S11. Transfer characteristics measured on the same **B2**, **B3** and **B4** OFETs at a drain-source voltage difference ( $V_{ds}$ ) of 80 V. The electron mobility is directly proportional to the slope of the square-root of  $I_{ds}$  as a function of  $V_{gs}$  using the standard formalism of OFETs in the saturation regime.
